# Supplementary material
Source: PubMed Central journal article supplement (PMC2757198)
Supplement: supp_M109.023754_jbc.M109.023754-1.pdf [file supp_M109.023754_jbc.M109.023754-1.pdf]

## Supplemental data

### Supplemental Figure 1

**NMII proteins and siRNA treated cells used in this study.** *A*, Purified NMII rod fragments were separated by SDS-PAGE and Coomassie stained. *B*, Western blot depicting the different NMII rod chimeras as detected by isoform specific antibodies. *C*, Western blot depicting the different full length NMII chimeras expressed in COS-7 cells. Note that GFP-NMII-A and GFP-NMII-B are larger than the HA tagged NMII-C constructs. COS-7 cells express NMII-B and NMII-C endogenously. Western blot depicting the expression levels of the three NMII isoforms after cell infection with NMII siRNA Lentivirus particles. *D*, NMII-A specific siRNA treated MEF B<sup>+</sup>/B<sup>-</sup> cells. *E*, NMII-C specific siRNA treated A549 cells.

### Supplemental Figure 2

**The tailpiece determines NMII-C paracrystal morphology.** Full length coiled-coil NMII-C (amino acids 856-2000), tailless full length coiled-coil NMII-C (amino acids 856-1953), and NMII-C rod fragment (amino acids 1288-2000) used in this study, were dialyzed against low NaCl buffer and stained with uranyl acetate as described in Experimental Procedures. Note the similar morphology between the full length coiled-coil NMII-C and NMII-C rod fragments indicating that the effect is due to the tailpiece. Bar=50nm.

### Supplemental Figure 3

**Focal adhesion in NMII-C siRNA treated cells.** A549 cells depleted of NMII-C were stained for Vinculin to detect focal adhesion complexes. Red: Actin, Green: Vinculin, Blue: siRNA marker.

### Supplemental Figure 4

In-vitro self-assembly of tail-swapped NMII rod fragments. 0.1 mg/ml rod fragments, were expressed and purified from *E. coli* as described in Experimental Procedures. Proteins were dialyzed against different NaCl concentrations and the extent of assembly was calculated as the percentage of rod fragment remaining in the supernatant after high speed centrifugation. Results are averages +/- S.D of at least three independent experiments.

### Supplemental Table 1

#### NMII Rod striation

Striation of paracrystals was measured from images as in Fig. 3 using Image-Pro plus software on calibrated electron micrographs at X88000 magnification.

| Rod              | Length (nm) | +/- SD |
|------------------|-------------|--------|
| NMII-A wild type | 15.28       | 1.66   |
| NMII-A-tailB     | 15.08       | 0.94   |
| NMII-A-tailC     | 14.93       | 1.39   |
| NMII-B wild type | 15.49       | 1.18   |
| NMII-B-tailA     | 13.36       | 1.23   |
| NMII-B-tailC     | 12.77       | 1.68   |
| NMII-C wild type | 14.35       | 1.76   |
| NMII-C-tailA     | 14.56       | 1.80   |
| NMII-C-tailB     | 16.47       | 0.78   |

## Supplemental Table 2

### Mapping of PKC and CKII phosphorylation sites on NMII-C

Peptide data obtained by mass spectrometry of phosphorylated NMII-C

| <b><u>MS/MS fragment</u></b>                 | <b>Amino Acid</b> | <b>Mr (Calc)</b> | <b>Mr (observed)</b> | <b>Delta</b> | <b>MASCOT ion score</b> |
|----------------------------------------------|-------------------|------------------|----------------------|--------------|-------------------------|
| GPLTF <b>p</b> TTR <b>p</b> TVR              | 1952-1968         | 1407.6312        | 704.9539             | 0.2620       | 46                      |
| ELEDV <b>p</b> TESAESMNR                     | 1927-1940         | 1687.7124        | 845.5539             | 1.3809       | 80                      |
| LEEGV <b>p</b> SDEEEAEGAEPGSAPGQEPEAPPPATPQ  | 1967-2000         | 3452.4304        | 1164.1252            | -0.0484      | 83                      |
| LEEGVASDEEEAEGAEPG <b>p</b> SAPGQEPEAPPPATPQ | 1967-2000         | 3452.4304        | 1151.4952            | -0.9666      | 49                      |
