# Supplementary material
Source: PubMed Central journal article supplement (PMC2757198)

Supplemental Fig. 1

A. NMII Rod fragment coomassie:

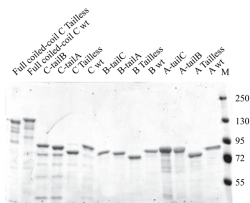

B. NMII Rod fragment Western blot:

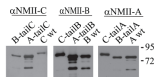

C. Full length NMII Western blot:

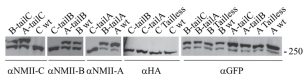

D. NMII-A siRNA treated B-/B- MEF's:

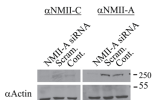

E. NMII-C siRNA treated A549 cells:

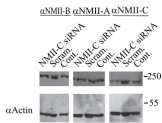

Supplement: supp_M109.023754_jbc.M109.023754-2.pdf [file supp_M109.023754_jbc.M109.023754-2.pdf]
