# Supplementary material
Source: PubMed Central journal article supplement (PMC2757198)

Supplemental Fig. 2

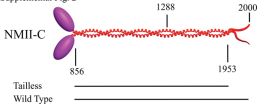

Tailless

Wild Type

Full Length  
Coiled-coil

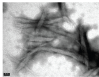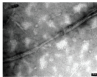

Rod  
fragment

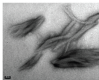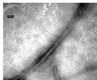

Supplement: supp_M109.023754_jbc.M109.023754-3.pdf [file supp_M109.023754_jbc.M109.023754-3.pdf]

# Supplemental Fig. 3

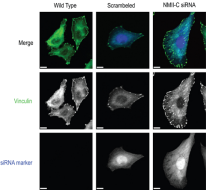

Supplement: supp_M109.023754_jbc.M109.023754-4.pdf [file supp_M109.023754_jbc.M109.023754-4.pdf]

Supplemental Fig.4

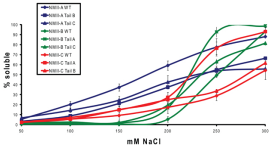

Supplement: supp_M109.023754_jbc.M109.023754-5.pdf [file supp_M109.023754_jbc.M109.023754-5.pdf]
